# Supplementary material for: Measurement report: Nocturnal subsidence behind the cold front enhances surface particulate matter in the plain regions: observation from the mobile multi-lidar system
Source: Copernicus journal article supplement (doi:10.5194/egusphere-2023-2178), 2023-10-09
Supplement: Supplementary file 1 [file egusphere-2023-2178-supplement.pdf]

## Supporting information for

# Measurement report: Nocturnal subsidence behind the cold front enhances surface particulate matter in the plain regions: observation from the mobile multi-lidar system

Wang et al.,

*Correspondence to:*

Haichao Wang (wanghch27@mail.sysu.edu.cn); Shaojia Fan (eesfsj@mail.sysu.edu.cn)

### Contents

**Figure S1.** Daily averaged concentration of PM<sub>2.5</sub> on 12 December in China

**Figure S2.** Sea level pressure field on 12, 13 December in Changzhou

**Figure S3.** Daily averaged concentration of PM<sub>2.5</sub> on 18 December in China

**Figure S4.** Sea level pressure field on 18, 19 December in Wangdu

**Figure S5.** Daily averaged concentration of PM<sub>2.5</sub> on 20 December in China

**Figure S6.** Sea level pressure field on 20, 21 December in Wangdu

**Figure S7.** The average sea level pressure field of all T-NPES events in Changzhou

**Figure S8.** The average sea level pressure field of all T-NPES events in Wangdu

**Figure S9.** A typical T-NPES event of Type 1

**Figure S10.** A typical T-NPES event of Type 2

**Figure S11.** A typical T-NPES event of Type 3

**Figure S12.** A typical T-NPES event of Type 4

**Figure S13.** Backward trajectories of Chengdu, ending at 0:00 on 7, 8 January

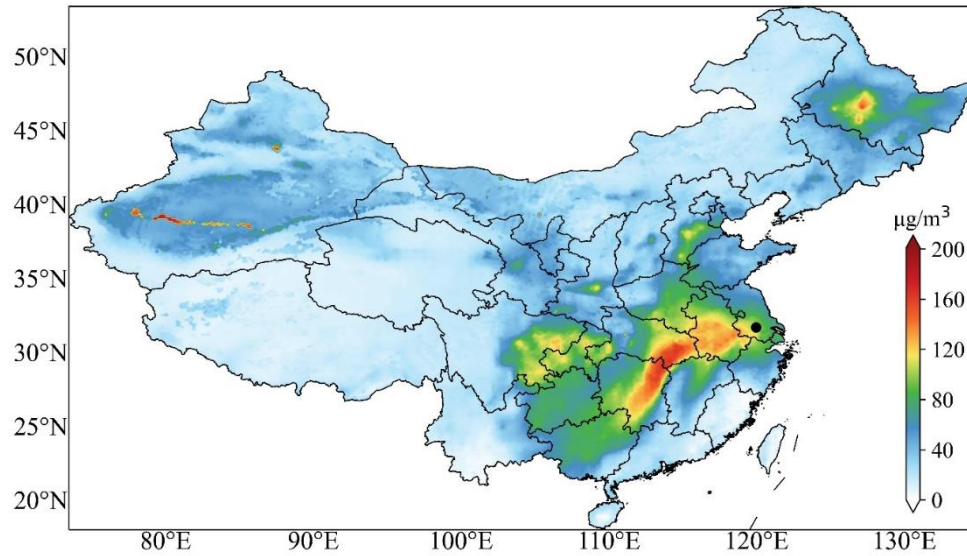

**Figure S1.** Daily averaged concentration of PM<sub>2.5</sub> (shaded, unit: µg/m<sup>3</sup>) on 12 December in China. The dark dot represents the observation site in Changzhou.

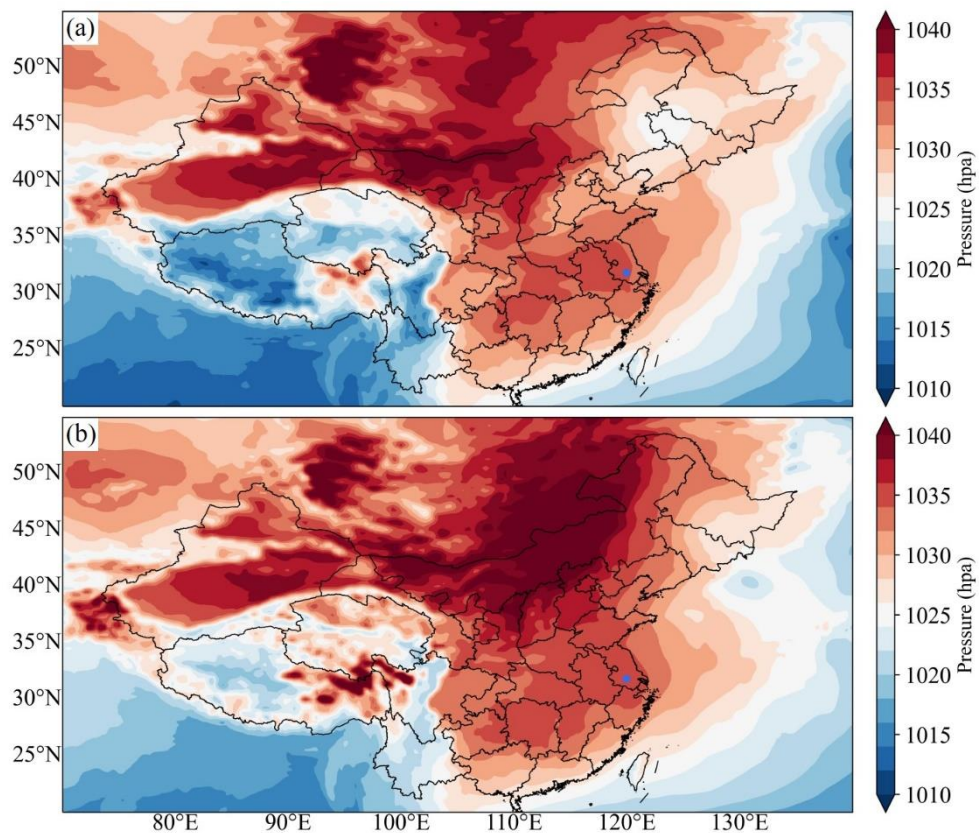

**Figure S2.** Sea level pressure (shaded, unit: hPa) field on (a) 20:00, 12 December and (b) 8:00, 13 December.

The blue dot represents the observation site in Changzhou.

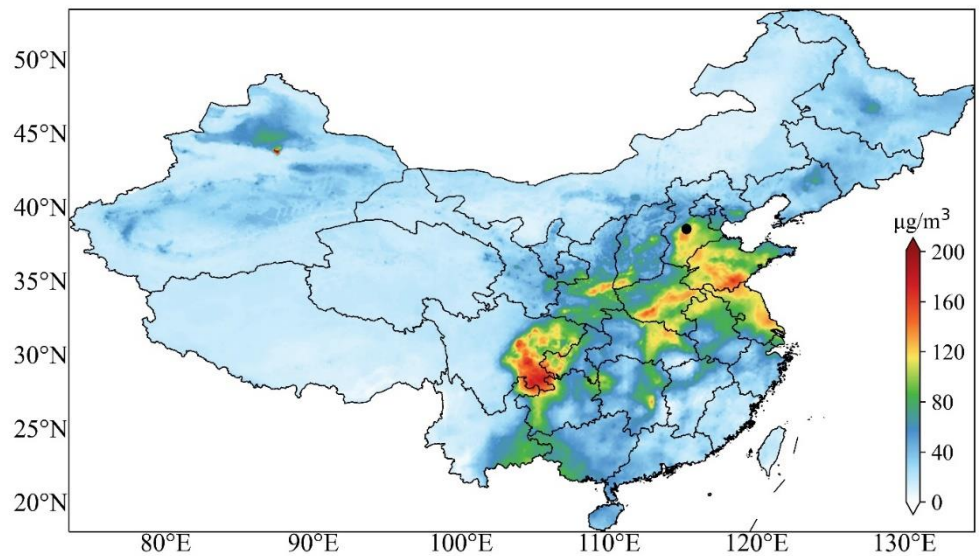

**Figure S3.** Daily averaged concentration of PM<sub>2.5</sub> (shaded, unit: µg/m<sup>3</sup>) on 18 December in China. The dark dot represents the observation site in Wangdu.

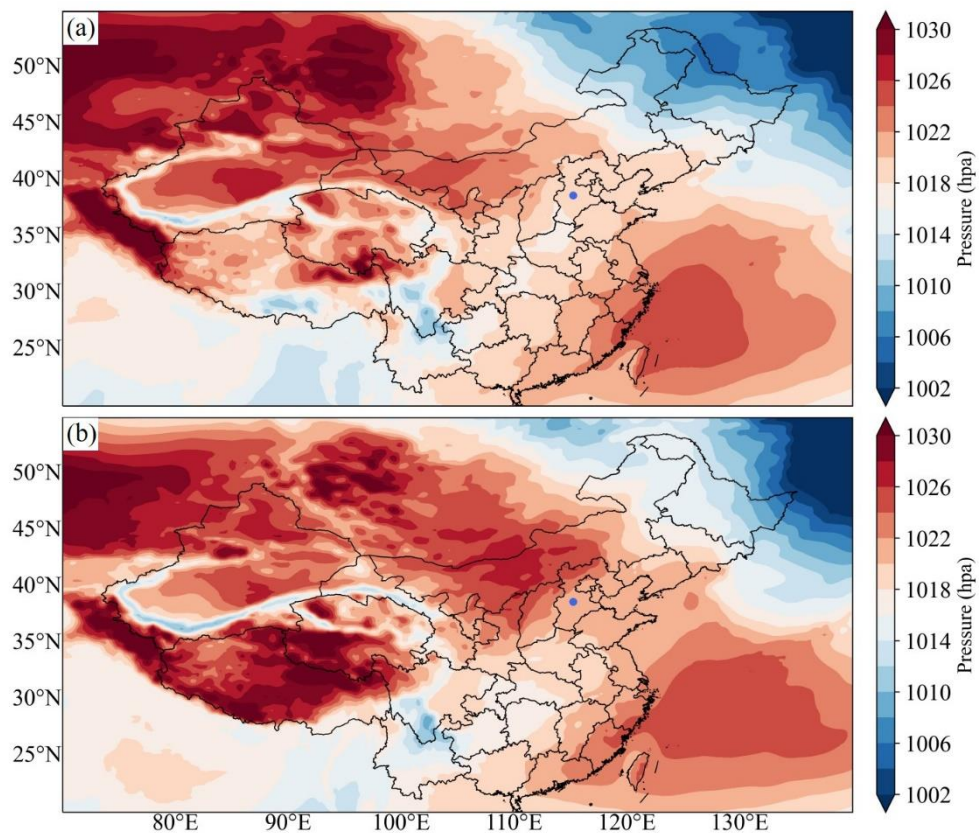

**Figure S4.** Sea level pressure (shaded, unit: hPa) field on (a) 20:00, 18 December and (b) 8:00, 19 December.

The blue dot represents the observation site in Wangdu.

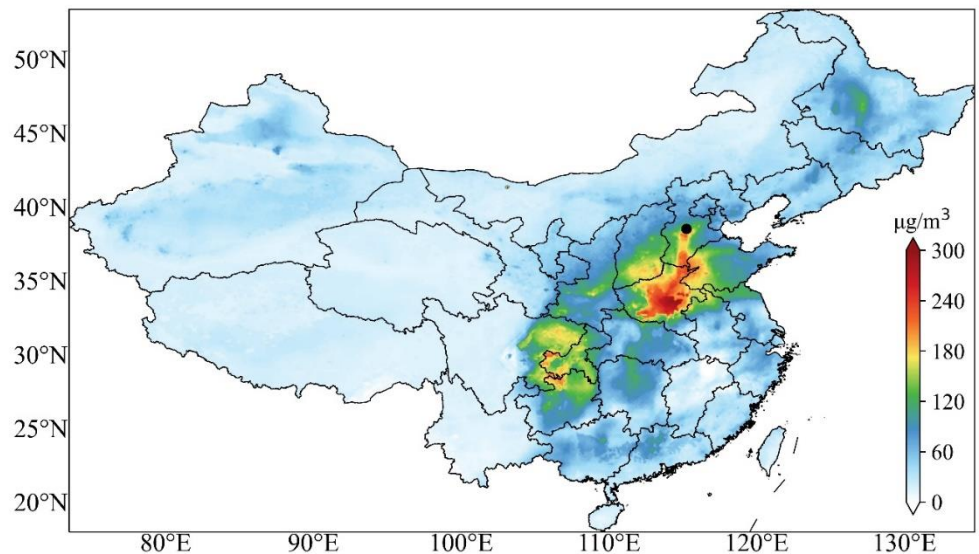

**Figure S5.** Daily averaged concentration of PM<sub>2.5</sub> (shaded, unit: µg/m<sup>3</sup>) on 20 December in China. The dark dot represents the observation site in Wangdu.



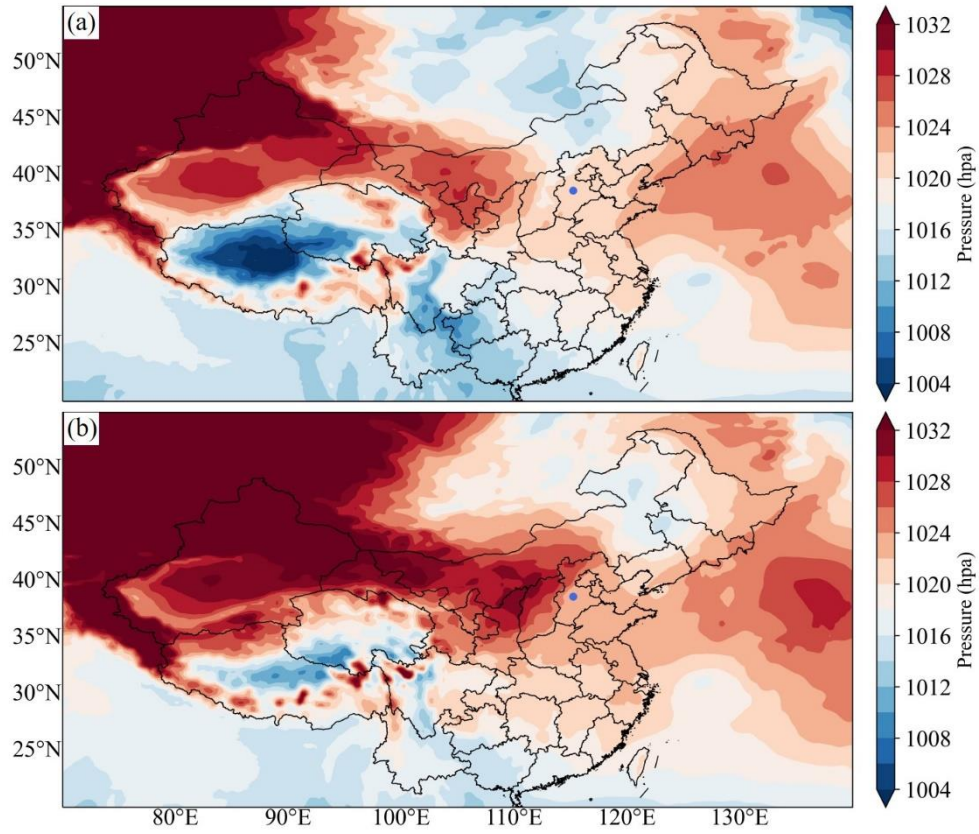

**Figure S6.** Sea level pressure (shaded, unit: hPa) field on (a) 20:00, 20 December and (b) 8:00, 21 December. The blue dot represents the observation site in Wangdu.

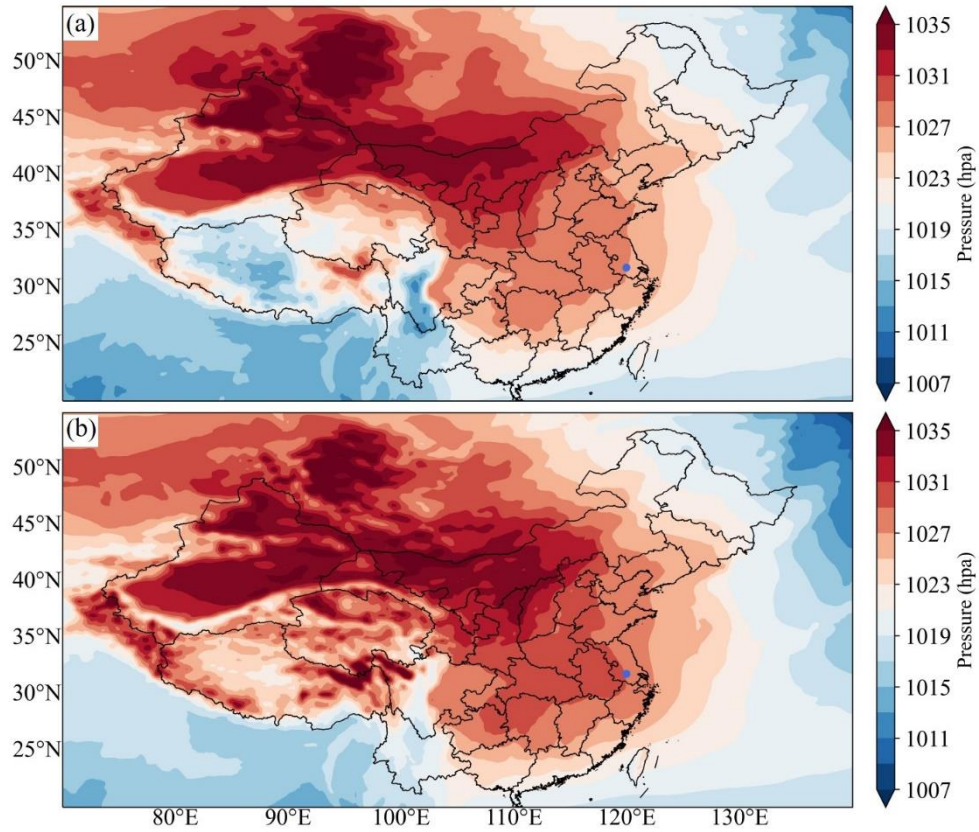

**Figure S7.** The average sea level pressure (shaded, unit: hPa) field on (a) 20:00 and (b) 8:00 in next day of all T-NPES events in Changzhou. The blue dot represents the observation site in Changzhou.

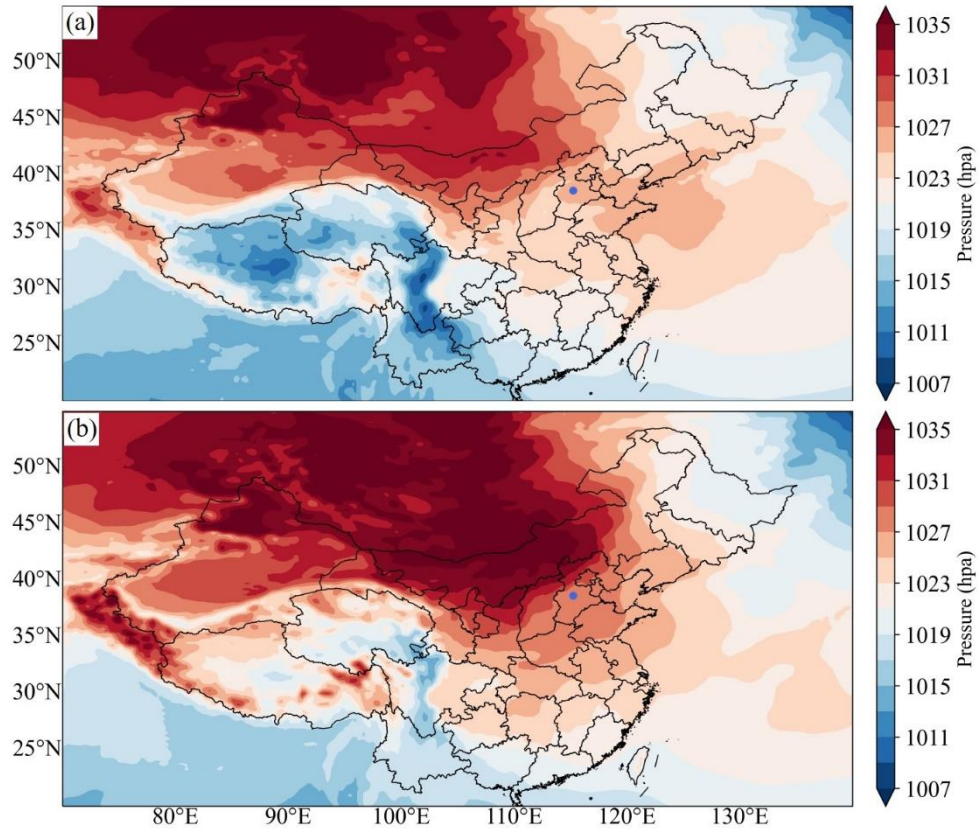

**Figure S8.** The average sea level pressure (shaded, unit: hPa) field on (a) 20:00 and (b) 8:00 in next day of all T-NPES events in Wangdu. The blue dot represents the observation site in Wangdu.

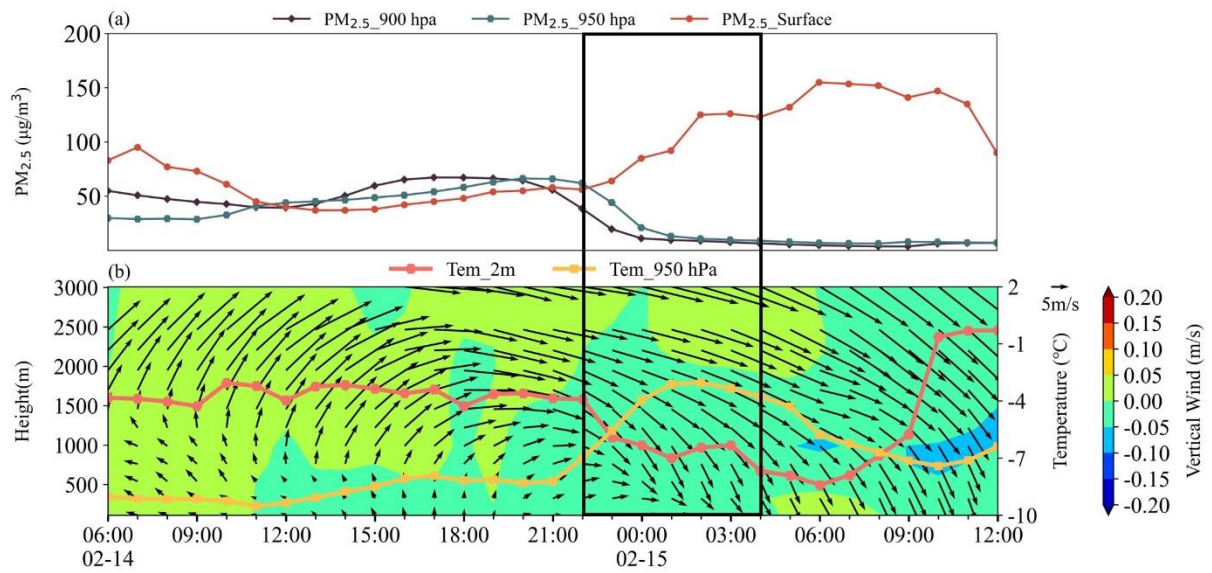

**Figure S9.** A typical T-NPES event of Type 1. The black box indicated the T-NPES event.

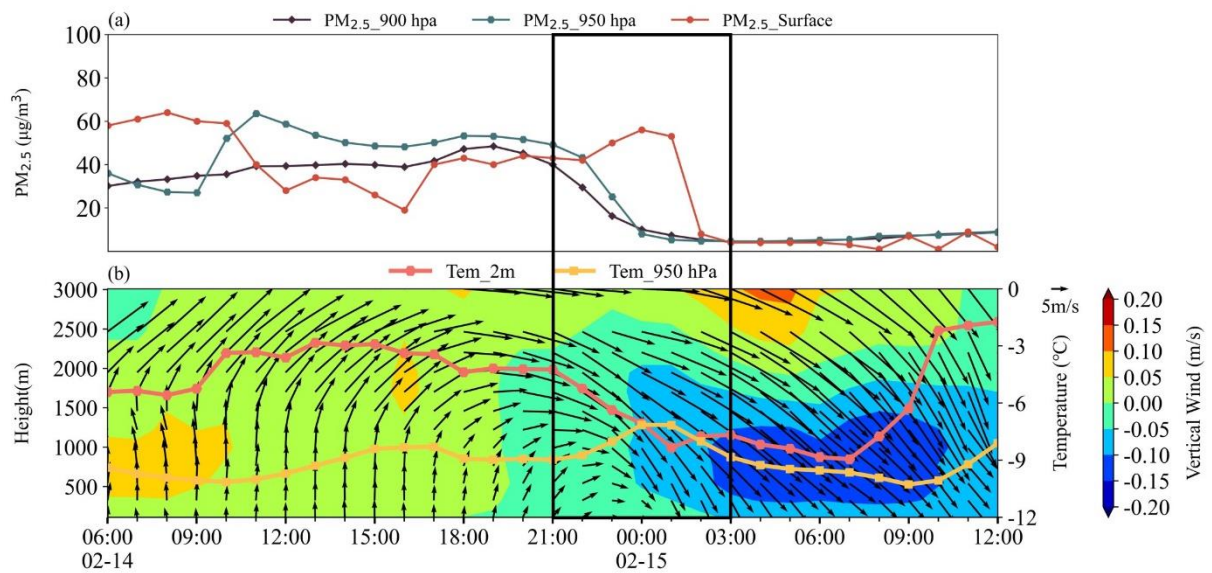

**Figure S10.** A typical T-NPES event of Type 2. The black box indicated the T-NPES event.



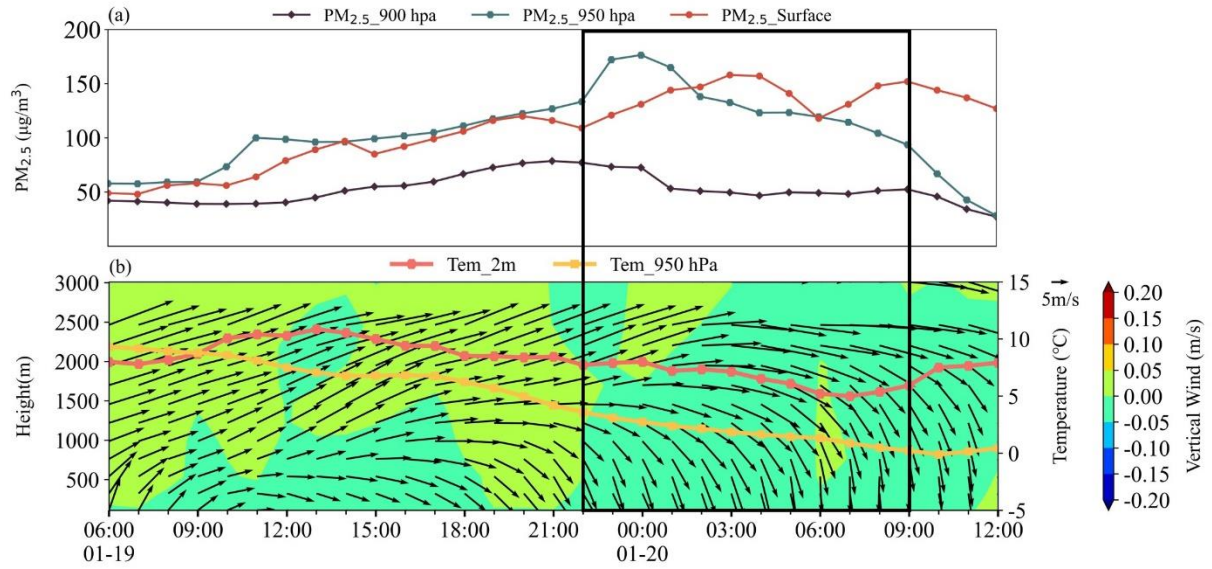

**Figure S11.** A typical T-NPES event of Type 3. The black box indicated the T-NPES event.

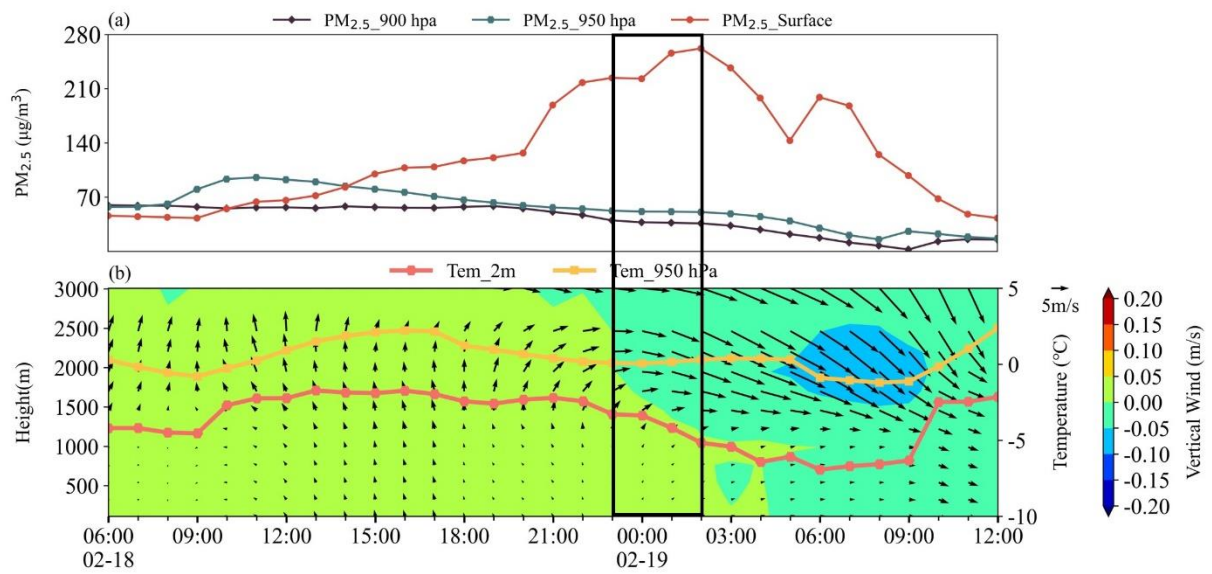

**Figure S12.** A typical T-NPES event of Type 4. The black box indicated the T-NPES event.

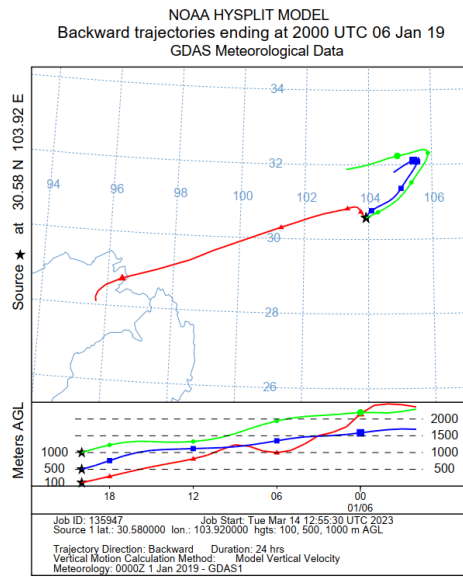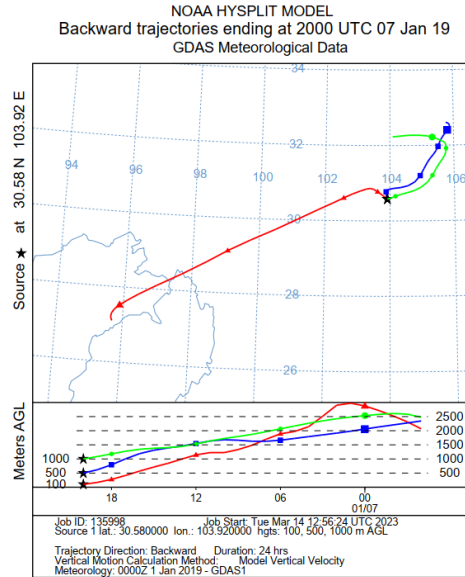

**Figure S13.** Backward trajectories of Chengdu at 100, 500, and 1000 m, ending at 0:00 on 7 and 8 January, determined by the HYSPLIT model.
